# Supplementary material for: Improving Reliability of the Virtual Screening Process for Human Dihydroorotate Dehydrogenase Enzyme by Combination of the Ensemble and Consensus Docking Approaches
Source: Research Square preprint supplement (doi:10.21203/rs.3.rs-352349/v1), 2021-03-26
Supplement: Supplementary file 1 [file dfa44bed64f7ef8e6426ae09.xls]

## Sheet: Sheet1
Table S1. AUC, EFs for 1, 3, 5 and 10 % and BEDROC 20 values of all 16 separate VS runs
Software	PDB structure	AUC	EF 1%	EF 3%	EF 5%	EF 10%	BEDROC 20	Top 25	Top 50	Top 100
VINA	4IGH	0.7547	13.4328	8.45771	5.67164	3.73134	0.342875	10	14	19
	5ZF4	0.806704	8.95522	7.9602	5.97015	4.1791	0.365827	7	15	20
	6J3C	0.76941	14.9254	7.46269	6.26866	3.58209	0.353774	10	15	21
	6GK0	0.738455	2.98507	0.995025	1.79104	1.79104	0.136654	2	2	6
ICM	4IGH	0.840546	13.4328	10.9453	8.65672	6.1194	0.49161	11	17	29
	5ZF4	0.699724	5.97015	4.97512	3.8806	3.13433	0.253852	6	10	13
	6J3C	0.752438	10.4478	6.96517	5.67164	4.62687	0.347025	8	13	19
	6GK0	0.706365	2.98507	1.49254	2.38806	2.23881	0.142608	3	3	8
LeDock	4IGH	0.766823	4.47761	3.9801	2.98507	3.73134	0.230573	3	6	10
	5ZF4	0.714735	1.49254	3.48259	2.98507	2.38806	0.177509	2	6	10
	6J3C	0.779833	2.98507	4.47761	3.8806	3.28358	0.251959	4	9	13
	6GK0	0.65806	2.98507	0.995025	1.19403	1.19403	0.0870653	2	2	4
rDock	4IGH	0.707847	1.49254	3.9801	3.28358	2.98507	0.208904	3	7	11
	5ZF4	0.785014	4.47761	5.97015	5.37313	3.8806	0.292663	4	11	18
	6J3C	0.669781	1.49254	2.98507	3.8806	2.68657	0.180883	1	5	13
	6GK0	0.617168	1.49254	3.48259	3.28358	1.79104	0.164045	3	6	11
